# Supplementary material for: Gas-phase synthesis of hybrid nanostructured materials
Source: Royal Society of Chemistry journal article supplement (doi:10.1039/c8nr06257a), 2018-01-01
Supplement: c8nr06257a1.pdf [file c8nr06257a1.pdf]

## Supporting Information

### Gas-phase Synthesis of Hybrid Nanostructured Materials

Min Ling, Christopher S. Blackman\*

Dr. Min Ling and Dr. Christopher S. Blackman

Department of Chemistry, University College London, 20 Gordon Street, London WC1H 0AJ,  
United Kingdom

E-mail: c.blackman@ucl.ac.uk

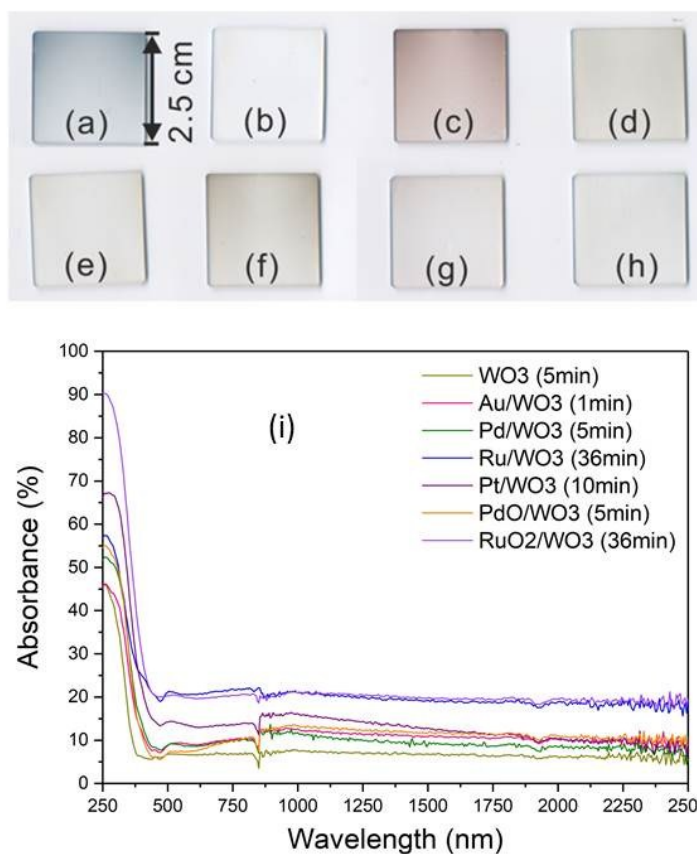

**Figure S 1.** The photographs of thin films (a) WO<sub>2.63</sub>, (b) WO<sub>3</sub>, (c) Au/WO<sub>3</sub> (1 min), (d) Pt/WO<sub>3</sub> (10 min), (e) Pd/WO<sub>3</sub> (5 min), (f) Ru/WO<sub>3</sub> (36 min), (g) PdO/WO<sub>3</sub> (5 min), (h) RuO<sub>2</sub>/WO<sub>3</sub> (36 min) on quartz and (i) absorbance spectrum of corresponding samples.

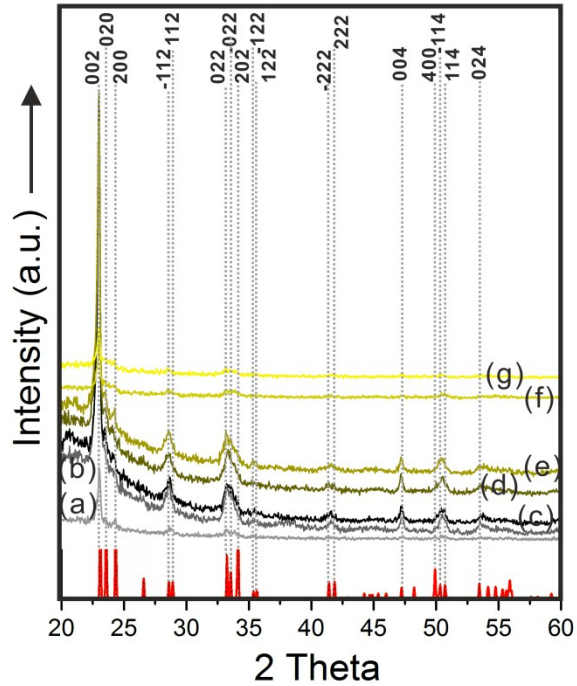

**Figure S 2.** XRD patterns of (a)  $\text{WO}_3$ , (b)  $\text{Au}/\text{WO}_3$  (1 min), (c)  $\text{Pt}/\text{WO}_3$  (10 min), (d)  $\text{Pd}/\text{WO}_3$  (5 min), (e)  $\text{Ru}/\text{WO}_3$  (36 min), (f)  $\text{PdO}/\text{WO}_3$  (5 min) and (g)  $\text{RuO}_2/\text{WO}_3$  (36 min) with matches the monoclinic  $\text{WO}_3$  reference pattern (red colour) (PDF 072-0677,  $a=7.306$ ,  $b=7.540$ ,  $c=7.692$  Å and  $\alpha=90^\circ$ ,  $\beta=90.881^\circ$ ,  $\gamma=90^\circ$ ).

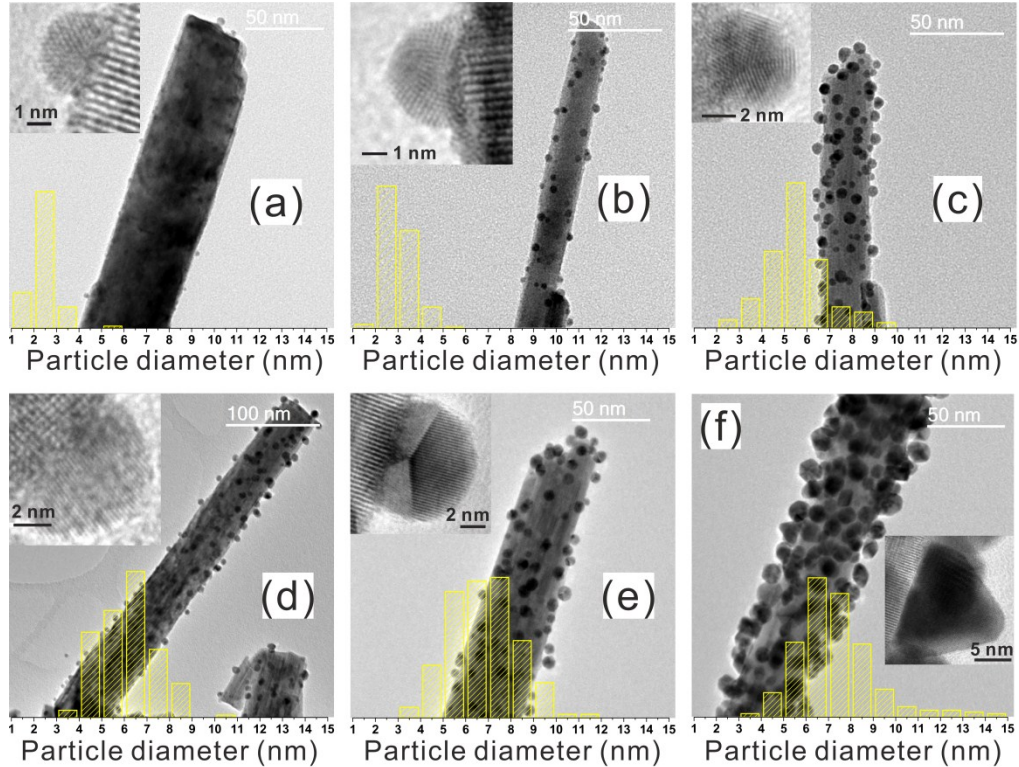

**Figure S 3.** TEM images of  $\text{Au}/\text{WO}_3$  hybrid nanostructure thin film: (a)  $\text{Au}/\text{WO}_3$  (0.5 min), (b)  $\text{Au}/\text{WO}_3$  (1 min), (c)  $\text{Au}/\text{WO}_3$  (5 min), (d)  $\text{Au}/\text{WO}_3$  (10 min), (e)  $\text{Au}/\text{WO}_3$  (20 min), (f)  $\text{Au}/\text{WO}_3$  (35 min) with Au NP size distributions on  $\text{WO}_3$  NR and inset zoom-in images of Au NP.

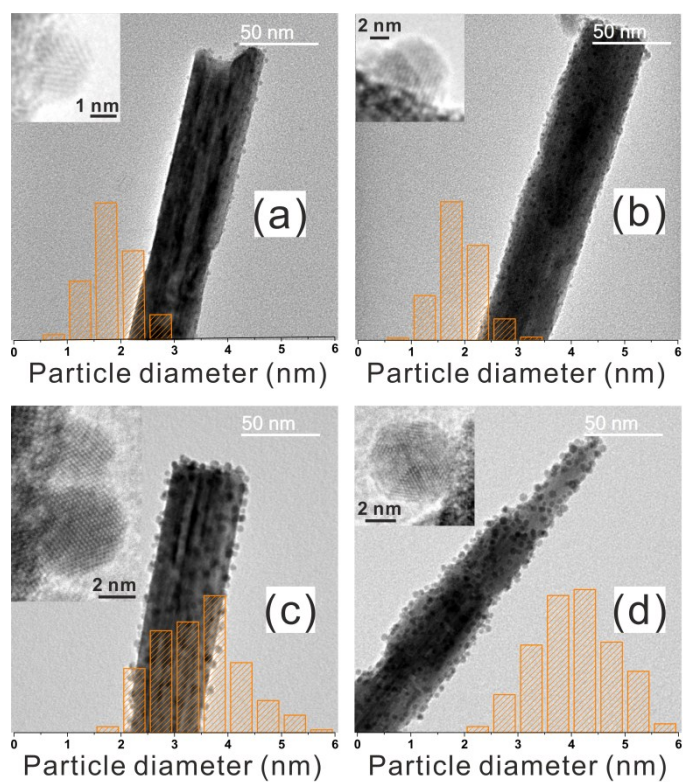

**Figure S 4.** TEM images of Pd/WO<sub>3</sub> hybrid nanostructure thin film: (a) Pd/WO<sub>3</sub> (5 min), (b) Pd/WO<sub>3</sub> (10 min), (c) Pd/WO<sub>3</sub> (20 min), (d) Pd/WO<sub>3</sub> (35 min) with Pd NP size distributions on WO<sub>3</sub> NR and inset zoom-in images of Pd NP.

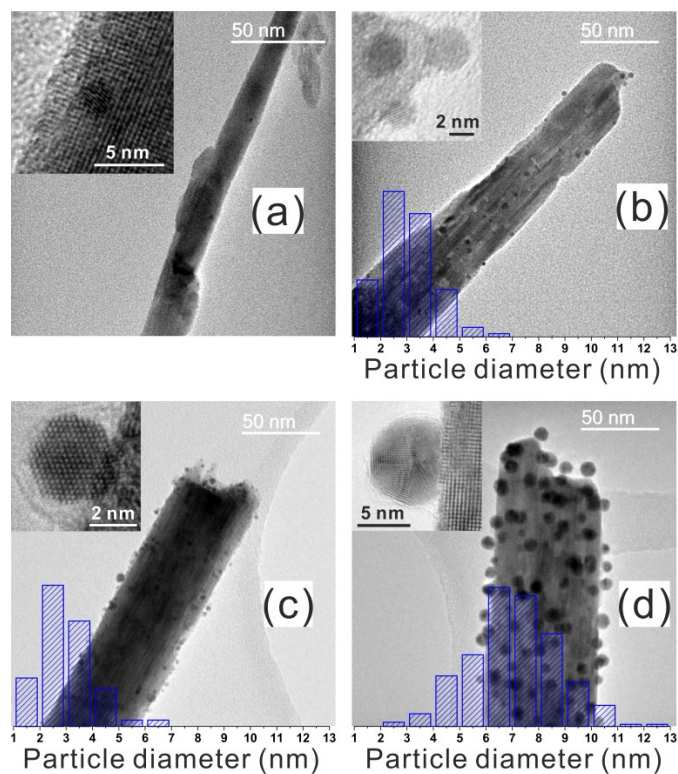

**Figure S 5.** TEM images of Pt/WO<sub>3</sub> hybrid nanostructure thin film: (a) Pt/WO<sub>3</sub> (1 min), (b) Pt/WO<sub>3</sub> (5 min), (c) Pt/WO<sub>3</sub> (10 min), (d) Pt/WO<sub>3</sub> (20 min) with Pt NP size distributions on WO<sub>3</sub> NR and inset zoom-in images of Pt NP.

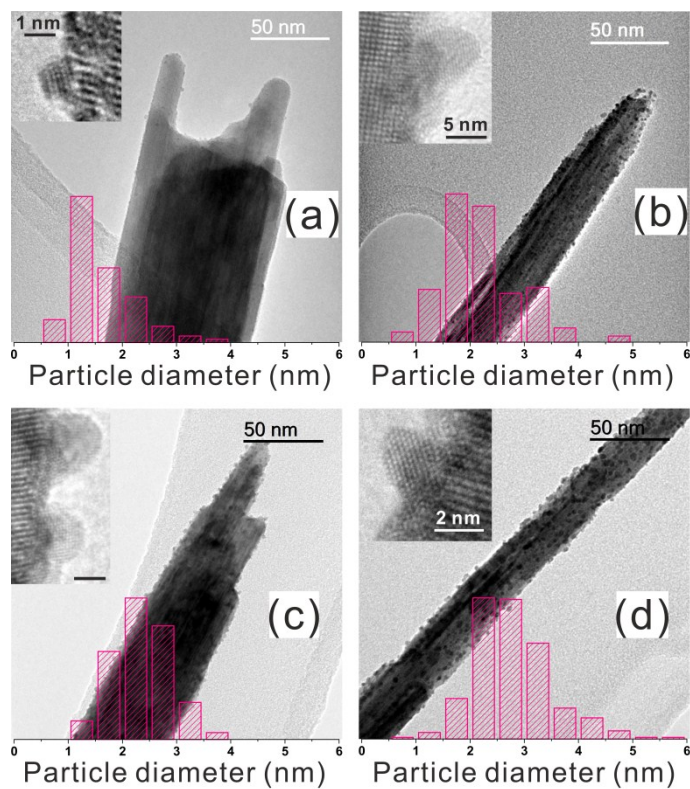

**Figure S 6.** TEM images of Ru/WO<sub>3</sub> hybrid nanostructure thin film: (a) Ru/WO<sub>3</sub> (1 min), (b) Ru/WO<sub>3</sub> (10 min), (c) Ru/WO<sub>3</sub> (20 min), (d) Ru/WO<sub>3</sub> (36 min) with Ru NP size distributions on WO<sub>3</sub> NR and inset zoom-in images of Ru NP.

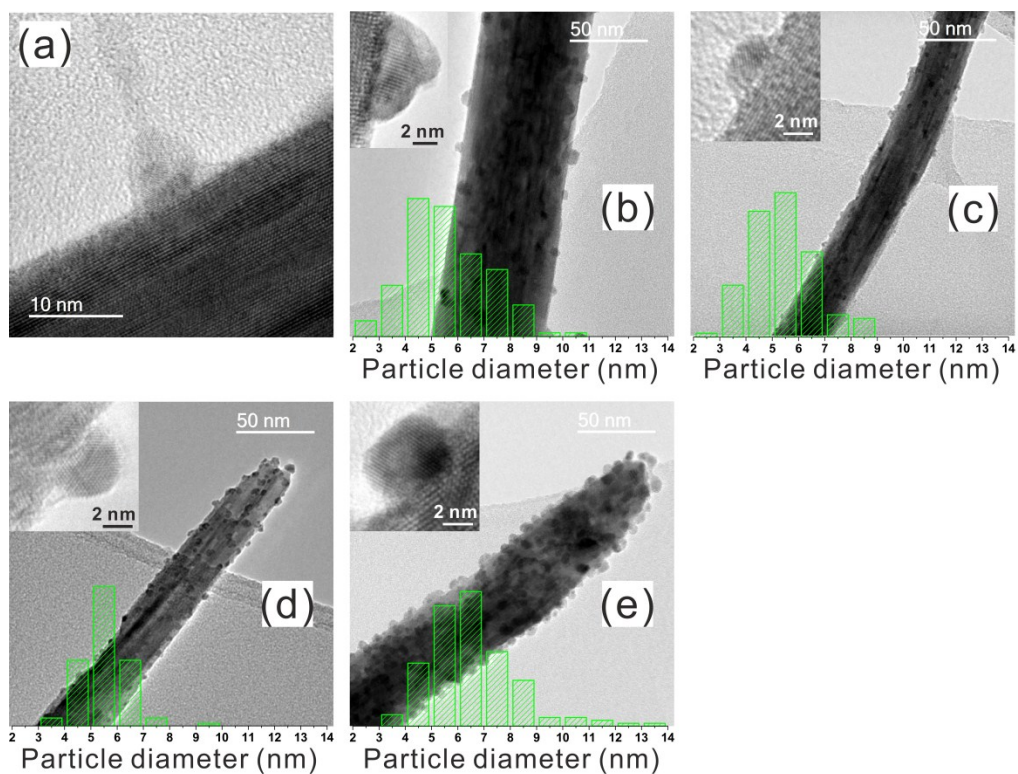

**Figure S 7.** TEM images of PdO/WO<sub>3</sub> hybrid nanostructure thin film: (a) PdO/WO<sub>3</sub> (1 min), (b) PdO/WO<sub>3</sub> (5 min), (c) PdO/WO<sub>3</sub> (10 min), (d) PdO/WO<sub>3</sub> (20 min), (e) PdO/WO<sub>3</sub> (35 min) with PdO NP size distributions on WO<sub>3</sub> NR and inset zoom-in images of PdO NP.

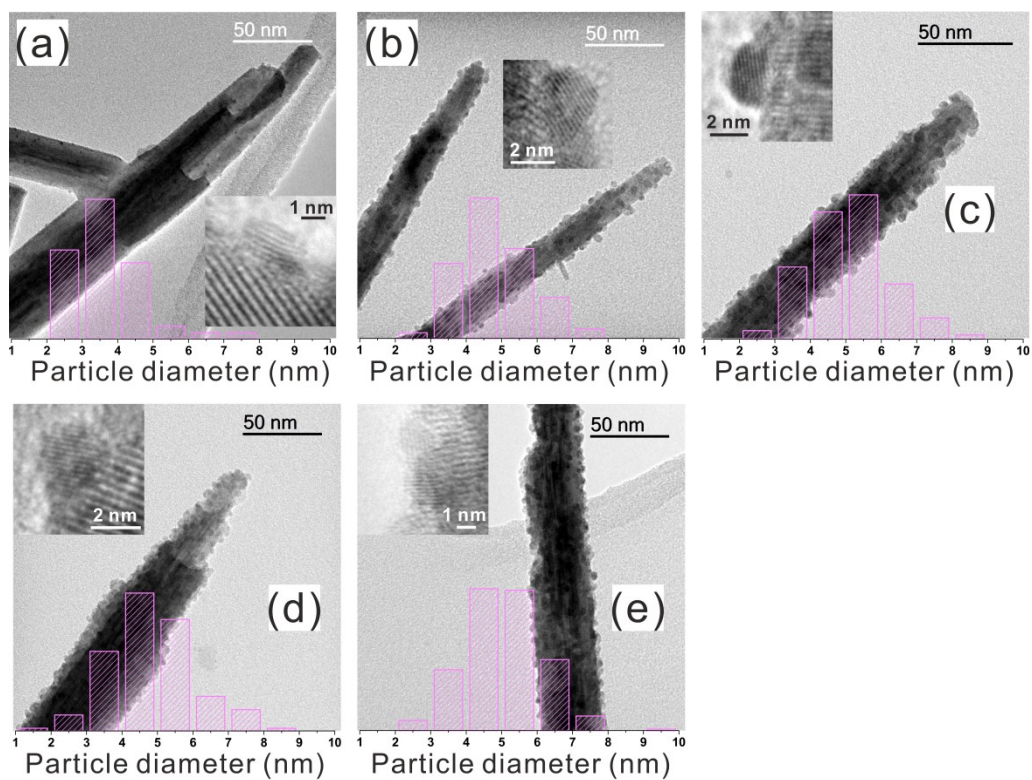

**Figure S 8.** TEM images of RuO<sub>2</sub>/WO<sub>3</sub> hybrid nanostructure thin film: (a) RuO<sub>2</sub>/WO<sub>3</sub> (1 min), (b) RuO<sub>2</sub>/WO<sub>3</sub> (5 min), (c) RuO<sub>2</sub>/WO<sub>3</sub> (10 min), (d) RuO<sub>2</sub>/WO<sub>3</sub> (20 min), (e) RuO<sub>2</sub>/WO<sub>3</sub> (36 min) with RuO<sub>2</sub> NP size distributions on WO<sub>3</sub> NR and inset zoom-in images of RuO<sub>2</sub> NP.

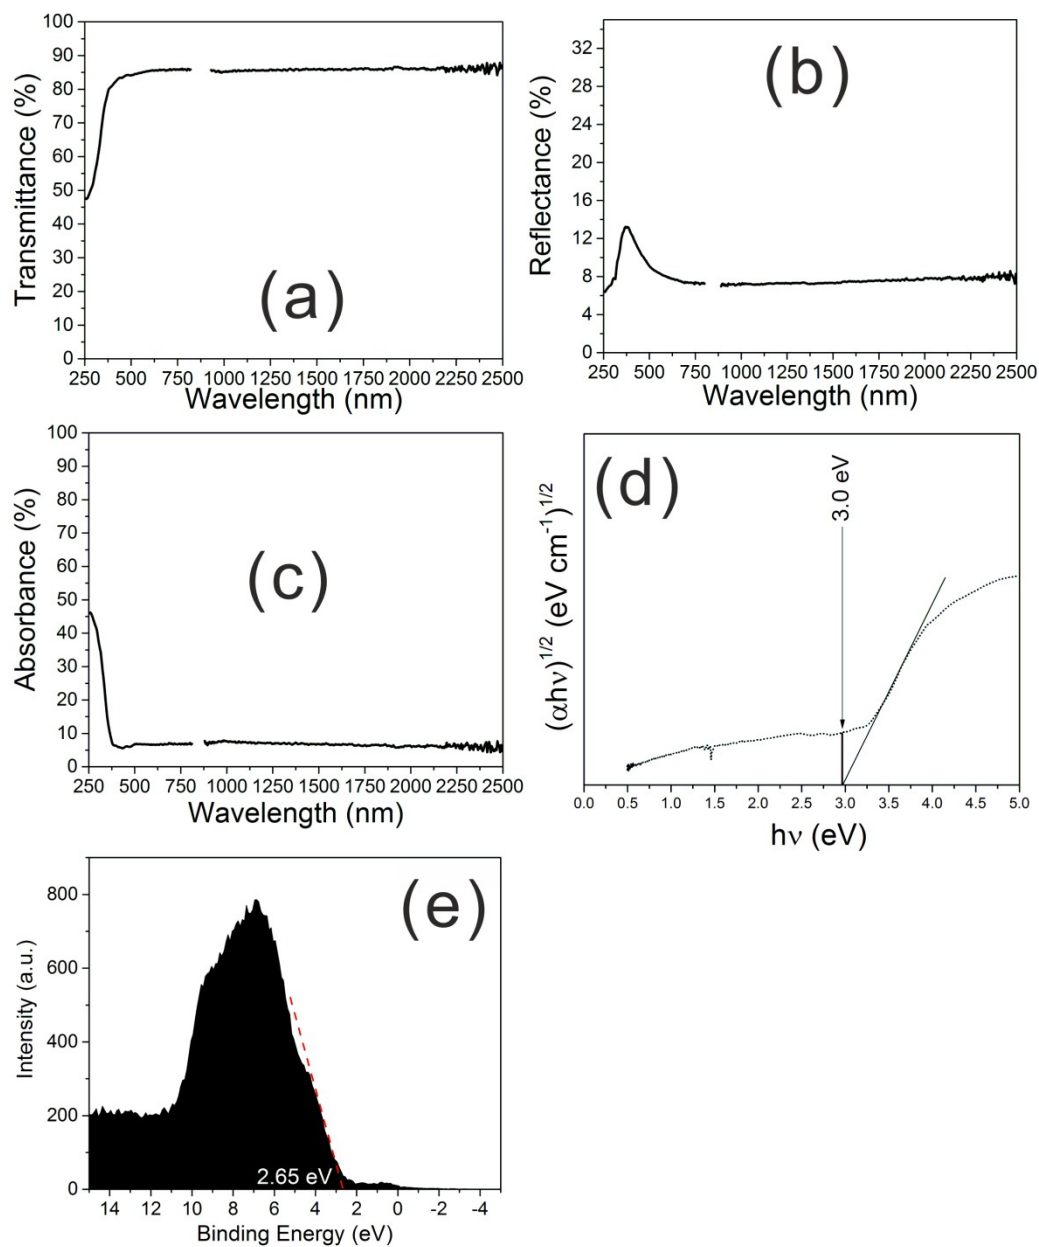

**Figure S 9.** The transmittance (a), reflectance (b) and absorbance (c) spectrum (aberrant data due to grating change of the UV-Vis spectrometer has been removed) of undecorated  $\text{WO}_3$  NR arrays thin film was used to calculate their bandgap (d, indirect) of 3.0 eV by tauc plots. XPS spectra for the valance band of undecorated  $\text{WO}_3$  NR arrays thin film (e) with reference C1s peak calibrated to 284.8 eV.

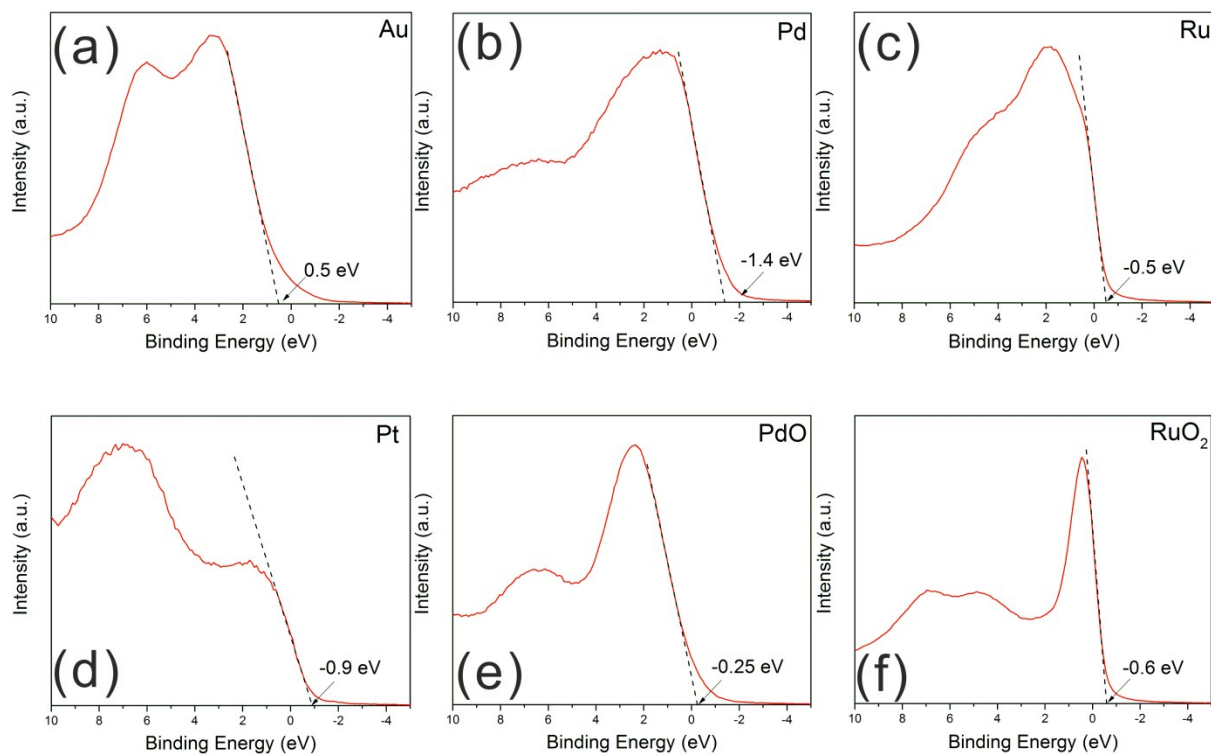

**Figure S 10.** The XPS valence band region of (a) Au, (b) Pd, (c) Ru, (d) Pt, (e) PdO and (f) RuO<sub>2</sub> thin films were deposited on quartz substrate for 45 min *via* AACVD, respecting to fermi level (BE=0 eV) and referencing to C 1s (284.8 eV).

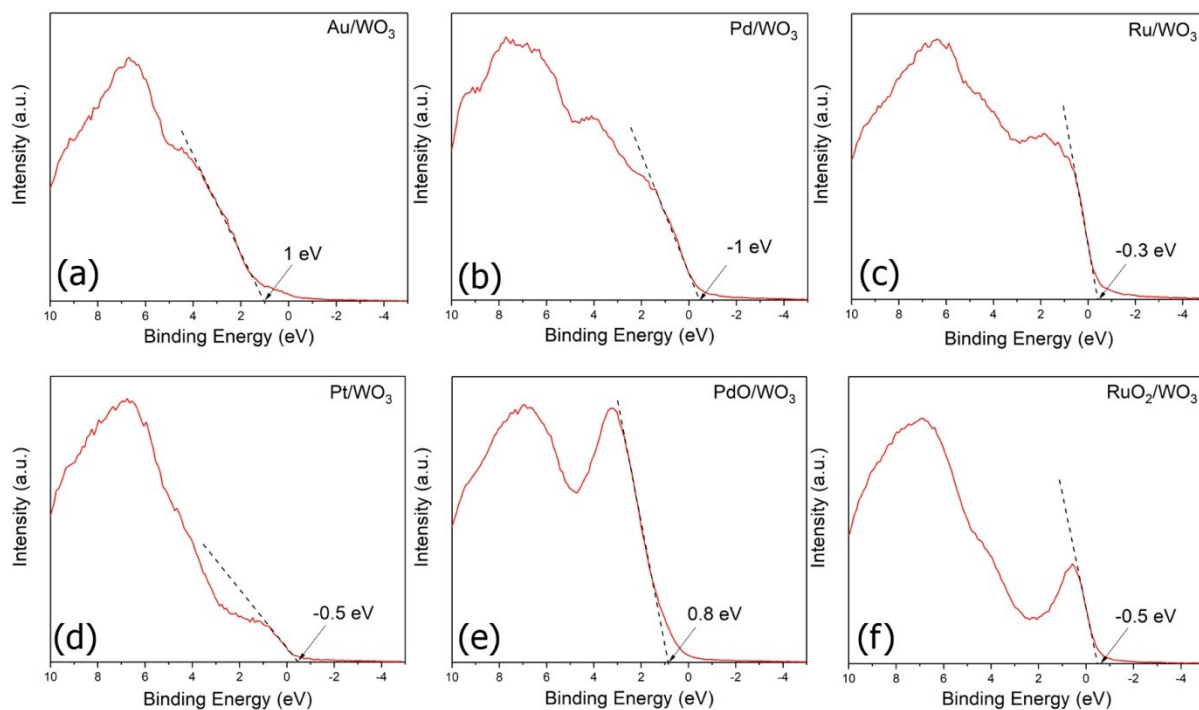

**Figure S 11.** The XPS valence band region of (a) Au/WO<sub>3</sub> (1 min), (b) Pd/WO<sub>3</sub> (5 min), (c) Ru/WO<sub>3</sub> (36 min), (d) Pt/WO<sub>3</sub> (10 min), (e) PdO/WO<sub>3</sub> (5 min), (f) RuO<sub>2</sub>/WO<sub>3</sub> (36 min), respecting to fermi level (BE=0 eV) and referencing to C 1s (284.8 eV).



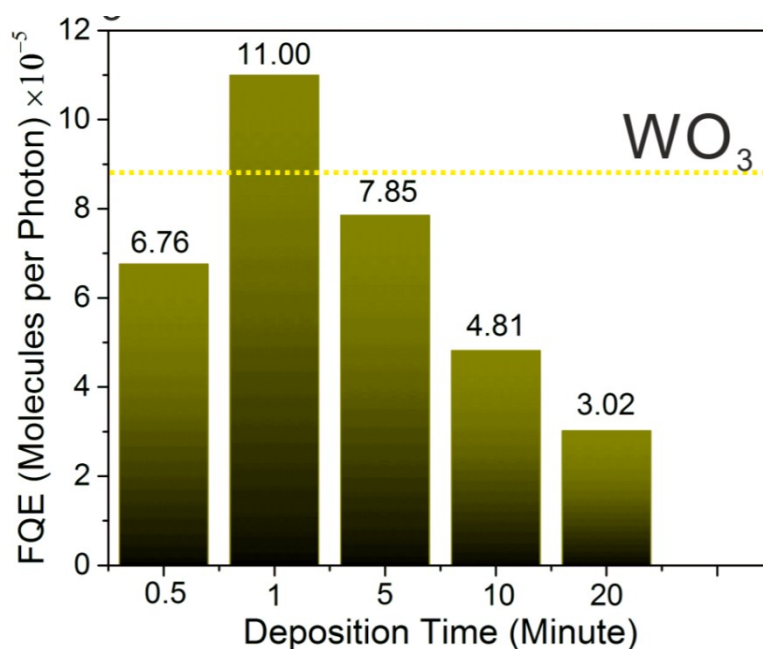

**Figure S 12.** The photocatalytic activity of Au/WO<sub>3</sub> thin films deposited for various time evaluated by formal quantum efficiencies (b), given as degraded SA molecules by per incident photon in unit (molecule photon<sup>-1</sup>), were calculated from the initial rates of photodegradation of SA (a), compared to undecorated WO<sub>3</sub> NR thin films (FQE = 8.67 × 10<sup>-5</sup>).

**Table S 1.** XPS quantification of sample Pd/WO<sub>3</sub> (5 min), Ru/WO<sub>3</sub> (36 min) and RuO<sub>2</sub>/WO<sub>3</sub> (36 min) based on figure 5c, d and f analysed via software CasaXPS (Version 2.3.16 PR 1.6).

| Sample                                     | Component         | Peak             | Position (/eV) | FWHM     | Area      | R.S.F     | At% Conc. |
|--------------------------------------------|-------------------|------------------|----------------|----------|-----------|-----------|-----------|
| Pd/WO <sub>3</sub> (5 min)                 | Pd metal          | 3d5/2            | 335.8          | 1.300    | 5484.65   | 16        | 43.54     |
|                                            |                   | 3d3/2            | 341.0          | 1.300    | 3657.21   | 16        | 29.03     |
|                                            | PdCl <sub>2</sub> | 3d5/2            | 338.3          | 2.076    | 2072.43   | 16        | 16.45     |
|                                            |                   | 3d3/2            | 343.1          | 2.076    | 1381.93   | 16        | 10.97     |
| Ru/WO <sub>3</sub> (36 min)                | C                 | 1 s              | 284.8          | 0.500    | 15794.91  | 1         | 33.45     |
|                                            |                   | Ru metal         | 3d5/2          | 280.1    | 0.759     | 108699.32 | 12.5      |
|                                            |                   | 3d3/2            | 284.2          | 0.759    | 72486.70  | 12.5      | 12.28     |
|                                            | RuO <sub>2</sub>  | 3d5/2            | 280.7          | 1.300    | 126991.18 | 12.5      | 21.51     |
| 3d3/2                                      |                   | 284.7            | 1.300          | 15794.91 | 12.5      | 14.35     |           |
| RuO <sub>2</sub> /WO <sub>3</sub> (36 min) | C                 | 1 s              | 284.8          | 0.794    | 25798.51  | 1         | 52.31     |
|                                            |                   | RuO <sub>2</sub> | 3d5/2          | 280.8    | 0.902     | 70865.15  | 12.5      |
|                                            | 3d3/2             |                  | 285.2          | 0.902    | 47255.98  | 12.5      | 7.66      |
|                                            | RuO <sub>3</sub>  | 3d5/2            | 282.6          | 2.979    | 105541.82 | 12.5      | 17.12     |
| 3d3/2                                      |                   | 286.5            | 2.979          | 70380.86 | 12.5      | 11.42     |           |
